# Supplementary material for: A unified approach to evolutionary conservation and population constraint in protein domains highlights structural features and pathogenic sites
Source: Research Square preprint supplement (doi:10.21203/rs.3.rs-3160340/v1), 2023-07-14
Supplement: Supplementary file 1 [file 612a11c5c9a3c1ac8275f63f.xlsx]

## Sheet: Sheet1
Supplementary Table 4. Strongly coupled sites table downloaded from the EVcouplings79 webserver after running the STF-1 nuclear receptor ligand binding domain sequence obtained from the Pfam domain alignment (PF00104).
Residue	# ECs	Cumulative Score	Conservation	CMD or UMD
A397	7	16.149	0.305	UMD
A415	6	15.312	0.389
A404	4	14.845	0.361
A364	2	13.284	0.463
A402	7	11.513	0.121
A372	5	11.404	0.32
A417	8	10.979	0.238
A405	6	10.596	0.272
A390	5	10.536	0.471
A294	3	10.522	0.665
A416	5	10.509	0.449
A309	4	10.087	0.225
A394	7	9.984	0.476
A398	5	9.413	0.165
A376	3	9.382	0.608
A377	5	9.284	0.421
A285	5	8.948	0.281
A408	6	8.67	0.174
A281	4	8.225	0.547	CMD
A280	3	8.194	0.532
A308	4	8.17	0.515
A373	3	7.551	0.537
A391	5	7.328	0.314
A375	3	7.181	0.36
A302	6	7.152	0.342
A367	3	7.127	0.729
A385	2	7.043	0.178
A330	4	7.032	0.08
A381	4	6.78	0.22
A418	4	6.716	0.31
A393	3	6.684	0.33
A286	2	6.599	0.787	CMD
A305	3	6.553	0.377	CMD
A399	6	6.523	0.082
A384	2	6.429	0.556
A409	2	6.368	0.202
A368	4	6.171	0.356
A395	5	5.631	0.262
A412	4	5.379	0.137
A374	2	5.308	0.453
A370	3	5.113	0.461
A277	3	5.093	0.477
A419	2	5.024	0.59
A304	3	4.884	0.437
A303	2	4.847	0.152	UMD
A312	3	4.73	0.137
A363	2	4.667	0.414
A424	3	4.631	0.336
A386	3	4.345	0.261
A297	2	4.334	0.794
A290	2	4.309	0.212
A379	2	4.268	0.289
A310	3	4.251	0.189	UMD
A425	4	4.202	0.203
A292	1	4.107	0.235
A406	4	4.105	0.108
A296	2	4.08	0.196
A298	2	4.048	0.642	CMD
A371	2	4.005	0.587
A422	3	3.905	0.273
A427	3	3.9	0.465
A295	3	3.854	0.296
A392	3	3.833	0.142
A335	3	3.815	0.117
A389	2	3.74	0.114
A279	2	3.708	0.591	CMD
A271	2	3.634	0.167
A401	3	3.543	0.761	CMD
A324	1	3.407	0.224
A264	2	3.21	0.177
A293	1	3.154	0.724
A321	2	3.099	0.223
A276	1	2.988	0.275
A333	2	2.932	0.184
A301	1	2.919	0.273	UMD
A288	1	2.806	0.2
A331	2	2.788	0.227
A322	2	2.78	0.109
A283	1	2.685	0.464
A366	1	2.676	0.187
A421	3	2.652	0.244
A357	2	2.592	0.221
A323	2	2.544	0.34	UMD
A378	2	2.355	0.323
A420	2	2.353	0.526
A336	2	2.316	0.139
A315	2	2.278	0.125
A311	2	2.231	0.32	UMD
A274	2	2.199	0.187
A396	1	2.199	0.138
A365	2	2.093	0.154
A414	2	2.058	0.086
A423	1	2.049	0.505
A383	2	2.039	0.323
A287	2	2.008	0.107
A332	2	1.964	0.137
A380	2	1.84	0.417
A344	1	1.785	0.146
A350	1	1.785	0.096
A273	1	1.774	0.464	CMD
A369	2	1.772	0.347
A270	2	1.744	0.23
A388	2	1.702	0.125
A400	1	1.584	0.289
A289	1	1.57	0.78
A356	1	1.496	0.12
A327	1	1.486	0.155
A334	1	1.486	0.141
A329	1	1.473	0.144
A278	1	1.333	0.29
A349	1	1.329	0.154
A430	1	1.325	0.257
A355	1	1.307	0.221
A403	1	1.217	0.118
A267	1	1.201	0.246
A359	1	1.177	0.145
A339	1	1.166	0.127
A337	1	1.164	0.109
A325	1	1.143	0.279
A428	1	1.111	0.175
A306	1	1.101	0.317
A348	1	1.091	0.202
A413	1	1.049	0.189
A266	1	0.998	0.27
A291	1	0.996	0.168
A411	1	0.963	0.178
A275	1	0.919	0.094
A282	1	0.919	0.155
A300	1	0.908	0.198
A354	1	0.86	0.4
A272	1	0.798	0.145	UMD
A326	1	0.798	0.177	UMD
A328	1	0.798	0.365
